# Supplementary material
Source: PubMed Central journal article supplement (PMC3014373)
Supplement: mmc1.pdf [file mmc1.pdf]

## Supplemental Data

### A Clinical Scoring System for Selection of Patients for PTEN Mutation Testing Is Proposed on the Basis of a Prospective Study of 3042 Probands

Min-Han Tan, Jessica Mester, Charissa Peterson, Yiran Yang, Jin-Lian Chen,  
Lisa A. Rybicki, Kresimira Milas, Holly Pederson, Berna Remzi,  
Mohammed S. Orloff, and Charis Eng

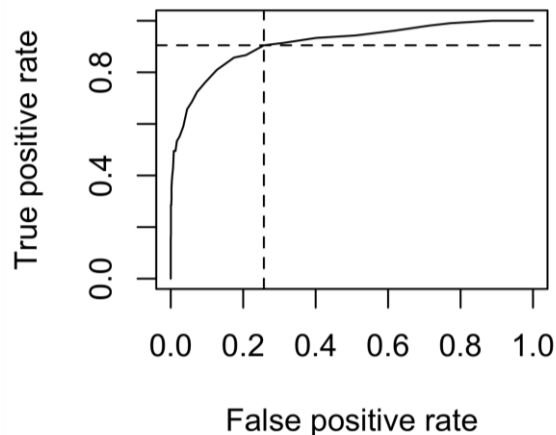

**Figure S1. ROC Curve Showing the Performance of the Cleveland Clinic (CC) Score in the CC Data Set**

The curve demonstrates true positive rate (sensitivity) varying with false positive rate (1-specificity) at various thresholds of CC score. The interrupted lines represent corresponding values at a threshold CC score of 10.

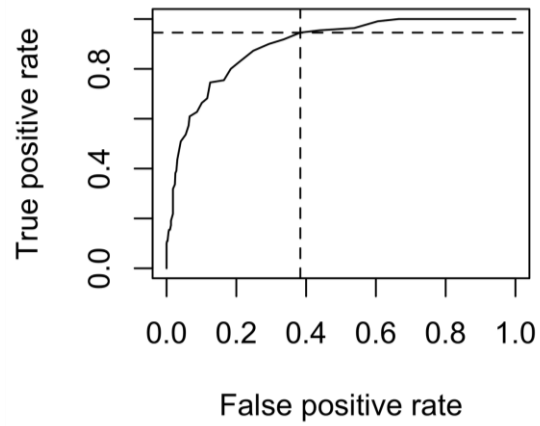

**Figure S2. ROC Curve Showing the Performance of the Cleveland Clinic (CC) Score in the Independent Ohio State University Data Set**

The curve demonstrates true positive rate (sensitivity) varying with false positive rate (1-specificity) at various thresholds of CC score. The interrupted lines represent corresponding values at a threshold CC score of 10.

**Table S1. *PTEN* Primers Used in Light Scanner (LS) and Sequencing (Seq)**

| <b>Name</b>                                                                                                       | <b>Sequence 5' -&gt; 3'</b>                                                                                                                        | <b>Annealing Temp (°C)</b>                   |
|-------------------------------------------------------------------------------------------------------------------|----------------------------------------------------------------------------------------------------------------------------------------------------|----------------------------------------------|
| PTEN LS E1F<br>PTEN LS E1R                                                                                        | GCAGCTTCTGCCATCTC<br>GCATCCGTCTACTCCCAC                                                                                                            | 60                                           |
| PTEN LS E2F<br>PTEN LS E2R                                                                                        | AGTATTCTTTTAGTTTGATTGCTGC<br>CTAAATGAAAACACAACATGAATATAAAC<br>A                                                                                    | 60                                           |
| PTEN LS E3F<br>PTEN LS E3R                                                                                        | ATGTTAGCTCATTTTTGTTAATGGTG<br>CAAGCAGATAACTTTCACTTAATAGTTG                                                                                         | 60                                           |
| PTEN LS E4F<br>PTEN LS E4R                                                                                        | TTTTTCTTCCTAAGTGCAAAGATAAC<br>CAGTAAGATACAGTCTATCGGGT                                                                                              | 60                                           |
| PTEN LS E5F<br><br>PTEN LS E5R<br>PTEN LS E5SeqF                                                                  | ACCTACTTGTTAATTAATAAATTCAAGAGT<br>T<br>ATCCAGGAAGAGGAAAGGAAA<br>TGCAACATTTCTAAAGTTACCTACTTG                                                        | 60<br><br>For sequencing                     |
| PTEN LS E6F<br>PTEN LS E6R                                                                                        | CCCAGTTACCATAGCAATTTAGTGA<br>TAGATATGGTTAAGAAAAGTGTCCAATA<br>C                                                                                     | 60                                           |
| PTEN LS E7F<br>PTEN LS E7R                                                                                        | CAGTTTGACAGTTAAAGGCATTTT<br>AATATAGCTTTTAATCTGTCCTTATTTTG<br>G                                                                                     | 61                                           |
| PTEN LS E8.1F<br><br>PTEN LS E8.1R                                                                                | TTTGTTGACTTTTTGCAAATGTTTAACAT<br>A<br>ATTTCTTGATCACATAGACTTCCA                                                                                     | 61                                           |
| PTEN LS E8.2F<br>PTEN LS E8.2R                                                                                    | GTAATACATTCTTCATACCAGGACC<br>GCTGTA CTCTAGAATTAACACAC                                                                                              | 61                                           |
| PTEN LS E9F<br>PTEN LS E9R<br>PTEN LS E9SeqF<br>PTEN LS E9SeqR                                                    | AAGATGAGTCATATTTGTGGGTT<br>TTTCAGTTTATTCAAGTTTATTTTCATGG<br>AGATGAGTCATATTTGTGGGTTTT<br>AAAGGTCCATTTTCAGTTTATTCAA                                  | 61<br><br>For sequencing<br>For sequencing   |
| PTEN LS SNP E8.2F<br>PTEN LS SNP E8.2R<br><br>PTEN LS SNP E8.2<br>Probe<br>PTEN-Promoter1F<br><br>PTEN-Promoter1R | GCAAATAAAGACAAAGCCAACCGA<br>AGCTGTACTCCTAGAATTAACACACAT<br>C<br>CATACAAGTCACCAACCCCCAC-block<br><br>GCGTGGTCACCTGGTCCTTT<br><br>GCTGCTCACAGGCGCTGA | 55<br>For Intronic 8 SNP<br><br>62<br><br>62 |

**Table S2. Pathogenic Mutations Identified in 290 Probands**  
(HG19 BUILD, NM\_000314.4)

|    | <b>Age</b> | <b>Variant Nucleotide</b> | <b>Variant Function</b>           | <b>Variant Protein</b> |
|----|------------|---------------------------|-----------------------------------|------------------------|
| 1  | 49.7       | c.592_601del10            | Deletion                          | p.(Met198Lysfs*20)     |
| 2  | 59.6       | c.302delT                 | Deletion                          | p.(Ile101Thrfs*12)     |
| 3  | 48.5       | c.48_49insA               | Insertion                         | p.(Gln17Thrfs*27)      |
| 4  | 20.9       | c.640C>T                  | Truncated protein                 | p.(Gln214*)            |
| 5  | 7.93       | ?_801+?del                | LargeDel                          |                        |
| 6  | 46.3       | c.686C>G                  | Truncated protein                 | p.(Ser229*)            |
| 7  | 60.2       | c.388C>T                  | Truncated protein                 | p.(Arg130*)            |
| 8  | 56.6       | c.388C>T                  | Truncated protein                 | p.(Arg130*)            |
| 9  | 63.7       | c.395G>A                  | Amino acid change                 | p.(Gly132Asp)          |
| 10 | 37.9       | c.634+2T>C                | Interference with splice junction |                        |
| 11 | 18         | c.461delT                 | Deletion                          | p.(Phe154Serfs*5)      |
| 12 | 56.9       | c.406T>C                  | Amino acid change                 | p.(Cys136Arg)          |
| 13 | 35.8       | c.635-1G>C                | Interference with splice junction |                        |
| 14 | 40.2       | c.103A>G                  | Amino acid change                 | p.(Met35Val)           |
| 15 | 56.5       | c.388C>T                  | Truncated protein                 | p.(Arg130*)            |
| 16 | 58.2       | c.-1195del12              | Promoter                          |                        |
| 17 | 51.1       | c.470_471insG             | Insertion                         | p.(Val158Serfs*22)     |
| 18 | 8.54       | c.188_189insAA            | Insertion                         | p.(Asn63Lysfs*37)      |
| 19 | 53.5       | c.210-1G>A                | Interference with splice junction |                        |
| 20 | 20.7       | c.284C>T                  | Amino acid change                 | p.(Pro95Leu)           |
| 21 | 10.8       | c.416T>G                  | Truncated protein                 | p.(Leu139*)            |
| 22 | 20         | c.800delA                 | Deletion                          | p.(Lys267Argfs*9)      |
| 23 | 43.8       | c.144C>A                  | Amino acid change                 | p.(Asn48Lys)           |
| 24 | 32.5       | c.287C>G                  | Amino acid change                 | p.(Pro96Arg)           |
| 25 | 62.5       | c.-1170C>T                | Promoter                          |                        |
| 26 | 8.25       | c.1-?_79+?del             | LargeDel                          |                        |
| 27 | 31.7       | c.1003C>T                 | Truncated protein                 | p.(Arg335*)            |
| 28 | 6.2        | c.1003C>T                 | Truncated protein                 | p.(Arg335*)            |
| 29 | 51.1       | c.884delT                 | Deletion                          | p.(Leu295Hisfs*12)     |
| 30 | 8.77       | c.406T>C                  | Amino acid change                 | p.(Cys136Arg)          |
| 31 | 48.5       | c.1027-2A>C               | Interference with splice junction |                        |
| 32 | 43.8       | c.389G>A                  | Amino acid change                 | p.(Arg130Gln)          |
| 33 | 9.1        | c.370T>C                  | Amino acid change                 | p.(Cys124Arg)          |
| 34 | 7.28       | ?_1212+?del               | LargeDel                          |                        |
| 35 | 61.4       | c.253+1G>A                | Interference with splice junction |                        |
| 36 | 63.1       | c.203A>G                  | Amino acid change                 | p.(Tyr68Cys)           |
| 37 | 31.3       | c.491delA                 | Deletion                          | p.(Lys164Argfs*3)      |
| 38 | 53.6       | c.1003C>T                 | Truncated protein                 | p.(Arg335*)            |
| 39 | 47.7       | c.388C>G                  | Amino acid change                 | p.(Arg130Gly)          |
| 40 | 23.5       | c.202T>C                  | Amino acid change                 | p.(Tyr68His)           |
| 41 | 70.3       | c.1019delA                | Deletion                          | p.(Asn340Ilefs*4)      |
| 42 | 11         | c.697C>T                  | Truncated protein                 | p.(Arg233*)            |
| 43 | 78.3       | c.633C>A                  | Truncated protein                 | p.(Cys211*)            |

|    |      |                |                                   |                    |
|----|------|----------------|-----------------------------------|--------------------|
| 44 | 45.7 | c.542delT      | Deletion                          | p.(Leu181Argfs*2)  |
| 45 | 51.2 | c.388C>T       | Truncated protein                 | p.(Arg130*)        |
| 46 | 61.1 | c.493G>C       | Amino acid change                 | p.(Gly165Arg)      |
| 47 | 18.7 | c.407G>A       | Amino acid change                 | p.(Cys136Tyr)      |
| 48 | 34.2 | c.870delA      | Deletion                          | p.(Glu291Lysfs*16) |
| 49 | 47.1 | c.-1170C>T     | Promoter                          |                    |
| 50 | 36.7 | c.1003C>T      | Truncated protein                 | p.(Arg335*)        |
| 51 | 8.31 | c.697C>T       | Truncated protein                 | p.(Arg233*)        |
| 52 | 52.5 | c.18_19delAG   | Deletion                          | p.(Glu7Aspfs*3)    |
| 53 | 77.6 | c.359C>A       | Amino acid change                 | p.(Ala120Glu)      |
| 54 | 8.7  | c.127G>A       | Amino acid change                 | p.(Glu43Lys)       |
| 55 | 7.02 | c.44ins16      | Insertion                         |                    |
| 56 | 52.5 | c.1066A>G      | Amino acid change                 | p.(Asn356Asp)      |
| 57 | 63   | c.613A>G       | Amino acid change                 | p.(Met205Val)      |
| 58 | 68.6 | c.388C>T       | Truncated protein                 | p.(Arg130*)        |
| 59 | 38.9 | c.1026+1G>C    | Interference with splice junction |                    |
| 60 | 58   | c.150delT      | Deletion                          | p.(Ile50Metfs*4)   |
| 61 | 14.5 | c.697C>T       | Truncated protein                 | p.(Arg233*)        |
| 62 | 50.4 | ?_164+?del     | LargeDel                          |                    |
| 63 | 45   | -834C>T        | Promoter                          |                    |
| 64 | 27.4 | c.388C>T       | Truncated protein                 | p.(Arg130*)        |
| 65 | 9.25 | c.1003C>T      | Truncated protein                 | p.(Arg335*)        |
| 66 | 73.7 | c.1003C>T      | Truncated protein                 | p.(Arg335*)        |
| 67 | 5.78 | c.18_19delAG   | Deletion                          | p.(Glu7Aspfs*3)    |
| 68 | 64.6 | c.209+1G>T     | Interference with splice junction |                    |
| 69 | 51.1 | c.1061C>A      | Amino acid change                 | p.(Pro354Gln)      |
| 70 | 6.33 | ?_164+?del     | LargeDel                          |                    |
| 71 | 51.8 | c.720C>A       | Truncated protein                 | p.(Tyr240*)        |
| 72 | 38.9 | c.1003C>T      | Truncated protein                 | p.(Arg335*)        |
| 73 | 56   | c.328C>T       | Truncated protein                 | p.(Gln110*)        |
| 74 | 16.9 | c.892C>T       | Truncated protein                 | p.(Gln298*)        |
| 75 | 7.78 | c.491delA      | Deletion                          | p.(Lys164Argfs*3)  |
| 76 | 45.8 | c.633C>A       | Truncated protein                 | p.(Cys211*)        |
| 77 | 58.2 | c.1033C>G      | Amino acid change                 | p.(Leu345Val)      |
| 78 | 40.6 | c.406T>C       | Amino acid change                 | p.(Cys136Arg)      |
| 79 | 52.2 | c.182A>G       | Amino acid change                 | p.(His61Arg)       |
| 80 | 15.7 | c.1003C>T      | Truncated protein                 | p.(Arg335*)        |
| 81 | 23.1 | AAinsGA        | InDel                             | p.(Asn323Metfs*21) |
| 82 | 51.6 | c.407_423del17 | Deletion                          | p.(Cys136Serfs*38) |
| 83 | 27.5 | c.987_990del4  | Deletion                          | p.(Asn329Lysfs*14) |
| 84 | 22   | c.586_587insT  | Insertion                         | p.(His196Leufs*6)  |
| 85 | 30   | c.406_407insA  | Insertion                         | p.(Cys136*)        |
| 86 | 65.2 | c.517C>T       | Amino acid change                 | p.(Arg173Cys)      |
| 87 | 13.9 | c.26delT       | Deletion                          | p.(Ser10Alafs*14)  |
| 88 | 47.5 | c.49C>T        | Truncated protein                 | p.(Gln17*)         |
| 89 | 42.3 | c.324delT      | Deletion                          | p.(Asp109Thrfs*4)  |
| 90 | 30.5 | c.41_43del3    | Deletion                          | p.(Arg15del)       |

|     |      |               |                                   |                    |
|-----|------|---------------|-----------------------------------|--------------------|
| 91  | 58.7 | c.697C>T      | Truncated protein                 | p.(Arg233*)        |
| 92  | 42.8 | c.476G>C      | Amino acid change                 | p.(Arg159Thr)      |
| 93  | 44   | c.734_737del4 | Deletion                          | p.(Gln245Argfs*10) |
| 94  | 46.8 | c.1003C>T     | Truncated protein                 | p.(Arg335*)        |
| 95  | 59.8 | c.388C>T      | Truncated protein                 | p.(Arg130*)        |
| 96  | 12.3 | c.1003C>T     | Truncated protein                 | p.(Arg335*)        |
| 97  | 59.4 | c.277C>T      | Amino acid change                 | p.(His93Tyr)       |
| 98  | 56.3 | c.388C>T      | Truncated protein                 | p.(Arg130*)        |
| 99  | 19.4 | c.512_513insA | Insertion                         | p.(Arg172Glu fs*8) |
| 100 | 37.8 | c.376G>C      | Amino acid change                 | p.(Ala126Pro)      |
| 101 | 25.7 | c.76A>C       | Amino acid change                 | p.(Thr26Pro)       |
|     |      | c.609_611delT |                                   |                    |
| 102 | 33.7 | CCinsATAAAT   | InDel                             | p.(Pro204*)        |
| 103 | 51.9 | c.72_73ins3   | Insertion                         |                    |
| 104 | 59.1 | c.-1195del12  | Promoter                          |                    |
| 105 | 54.6 | c.542T>C      | Amino acid change                 | p.(Leu181Pro)      |
| 106 | 39.6 | c.181C>T      | Amino acid change                 | p.(His61Tyr)       |
| 107 | 59   | c.-834C>T     | Promoter                          |                    |
| 108 | 47.1 | c.388C>T      | Truncated protein                 | p.(Arg130*)        |
| 109 | 47.7 | c.195_196insT | Insertion                         | p.(Lys66*)         |
| 110 | 42.8 | c.389G>A      | Amino acid change                 | p.(Arg130Gln)      |
| 111 | 48.5 | c.389G>A      | Amino acid change                 | p.(Arg130Gln)      |
| 112 | 4.7  | c.302T>C      | Amino acid change                 | p.(Ile101Thr)      |
| 113 | 48.8 | c.235G>A      | Amino acid change                 | p.(Ala79Thr)       |
| 114 | 3.64 | c.737C>T      | Amino acid change                 | p.(Pro246Leu)      |
| 115 | 46.1 | c.697C>T      | Truncated protein                 | p.(Arg233*)        |
| 116 | 24.5 | c.382A>G      | Amino acid change                 | p.(Lys128Glu)      |
| 117 | 5.14 | c.486C>G      | Amino acid change                 | p.(Asp162Glu)      |
| 118 | 9.62 | c.75G>T       | Amino acid change                 | p.(Leu25Phe)       |
| 119 | 57.7 | c.71A>G       | Amino acid change                 | p.(Asp24Gly)       |
| 120 | 45.4 | c.475A>G      | Amino acid change                 | p.(Arg159Gly)      |
| 121 | 7.69 | c.204C>A      | Truncated protein                 | p.(Tyr68*)         |
| 122 | 52.6 | c.883_884insT | Insertion                         | p.(Cys296Met fs*2) |
| 123 | 48.8 | c.334_335insG | Insertion                         | p.(Leu112Arg fs*3) |
| 124 | 65.4 | c.70G>C       | Amino acid change                 | p.(Asp24His)       |
| 125 | 21.8 | c.1026+1G>A   | Interference with splice junction |                    |
| 126 | 72.8 | c.389G>A      | Amino acid change                 | p.(Arg130Gln)      |
| 127 | 42.8 | c.388C>T      | Truncated protein                 | p.(Arg130*)        |
| 128 | 22.5 | c.509G>T      | Amino acid change                 | p.(Ser170Ile)      |
| 129 | 4.98 | c.562T>C      | Amino acid change                 | p.(Tyr188His)      |
| 130 | 62.9 | c.697C>T      | Truncated protein                 | p.(Arg233*)        |
| 131 | 35.5 | c.761A>C      | Amino acid change                 | p.(Lys254Thr)      |
| 132 | 3.01 | c.697C>T      | Truncated protein                 | p.(Arg233*)        |
| 133 | 67.2 | c.464A>G      | Amino acid change                 | p.(Tyr155Cys)      |
| 134 | 29   | c.635-1G>C    | Interference with splice junction |                    |
|     |      | c.177_179delA |                                   |                    |
| 135 | 42   | AA            | Deletion                          | p.(Lys60del)       |
| 136 | 44.3 | c.1026+1G>C   | Interference with splice junction |                    |
| 137 | 8.5  | c.448G>T      | Truncated protein                 | p.(Glu150*)        |
| 138 | 4.9  | c.164+1-      | Interference with splice junction |                    |

|     |      | 5delGTAAG<br>c.872_873insAA     |                                   |                   |
|-----|------|---------------------------------|-----------------------------------|-------------------|
| 139 | 11.4 | AA                              | Insertion                         | p.(Asn292Lysfs*7) |
| 140 | 12.6 | c.513_514insA                   | Insertion                         | p.(Arg172Lysfs*8) |
| 141 | 12.4 | c.101C>A                        | Amino acid change                 | p.(Ala34Asp)      |
| 142 | 8.8  | c.389G>A                        | Amino acid change                 | p.(Arg130Gln)     |
| 143 | 6.3  | c.389G>A                        | Amino acid change                 | p.(Arg130Gln)     |
| 144 | 12.9 | c.388C>T                        | Truncated protein                 | p.(Arg130*)       |
| 145 | 46.5 | c.210-1G>A                      | Interference with splice junction |                   |
| 146 | 47.8 | c.1003C>T                       | Truncated protein                 | p.(Arg335*)       |
| 147 | 7.5  | c.250A>T                        | Truncated protein                 | p.(Arg84*)        |
| 148 | 29.7 | c.1003C>T                       | Truncated protein                 | p.(Arg335*)       |
| 149 | 55.4 | c.513_514insA<br>c.892_893insAA | Insertion                         | p.(Arg172Lysfs*8) |
| 150 | 67.4 | AA                              | Insertion                         | p.(Glu299Lysfs*5) |
| 151 | 53   | c.801+1G>A                      | Interference with splice junction |                   |
| 152 | 29.5 | c.801+1G>A                      | Interference with splice junction |                   |
| 153 | 51.5 | c.1-?_439+?del                  | LargeDel                          |                   |
| 154 | 47.8 | c.1-?_439+?del                  | LargeDel                          |                   |
| 155 | 8.9  | c.800delA                       | Deletion                          | p.(Lys267Argfs*9) |
| 156 | 6.6  | c.94_96delATT                   | Deletion                          | p.(Ile33del)      |
| 157 | 49.1 | c.388C>G                        | Amino acid change                 | p.(Arg130Gly)     |
| 158 | 9    | c.278A>G                        | Amino acid change                 | p.(His93Arg)      |
| 159 | 10.8 | c.155A>G                        | Amino acid change                 | p.(Asp52Gly)      |
| 160 | 21.7 | c.210-1G>A                      | Interference with splice junction |                   |
| 161 | 42.1 | c.315delT                       | Deletion                          | p.(Cys105Trpfs*8) |
| 162 | 32.9 | c.633C>A                        | Truncated protein                 | p.(Cys211*)       |
| 163 | 18.7 | c.388C>T                        | Truncated protein                 | p.(Arg130*)       |
| 164 | 44   | c.388C>T                        | Truncated protein                 | p.(Arg130*)       |
| 165 | 47   | c.493G>C                        | Amino acid change                 | p.(Gly165Arg)     |
| 166 | 51.3 | c.1003C>T<br>c.459_461delTT     | Truncated protein                 | p.(Arg335*)       |
| 167 | 43.6 | T<br>c.459_461delTT             | Deletion                          | p.(Phe154del)     |
| 168 | 16   | T                               | Deletion                          | p.(Phe154del)     |
| 169 | 12.1 | c.104T>C                        | Amino acid change                 | p.(Met35Thr)      |
| 170 | 21.9 | c.389G>A                        | Amino acid change                 | p.(Arg130Gln)     |
| 171 | 9.8  | c.1003C>T                       | Truncated protein                 | p.(Arg335*)       |
| 172 | 41   | c.176C>A                        | Truncated protein                 | p.(Ser59*)        |
| 173 | 41.7 | c.1027-2A>C                     | Interference with splice junction |                   |
| 174 | 35.4 | c.445C>T<br>c.1-                | Truncated protein                 | p.(Gln149*)       |
| 175 | 14.2 | ?_1212+?del                     | LargeDel                          |                   |
| 176 | 61.9 | c.388C>T                        | Truncated protein                 | p.(Arg130*)       |
| 177 | 51.5 | c.1033C>G<br>c.155_157delAT     | Amino acid change                 | p.(Leu345Val)     |
| 178 | 43   | G<br>c.955_958delA              | Deletion                          | p.(Asp52del)      |
| 179 | 18.9 | CTT                             | Deletion                          | p.(Thr319*)       |
| 180 | 60.1 | c.389G>A                        | Amino acid change                 | p.(Arg130Gln)     |

|     |      |                                  |                                   |                    |
|-----|------|----------------------------------|-----------------------------------|--------------------|
| 181 | 16.9 | c.316G>T                         | Truncated protein                 | p.(Glu106*)        |
| 182 | 15.3 | c.316G>T                         | Truncated protein                 | p.(Glu106*)        |
| 183 | 44.1 | c.316G>T                         | Truncated protein                 | p.(Glu106*)        |
| 184 | 49.3 | c.957delT<br>c.155_157delAT      | Deletion                          | p.(Leu320*)        |
| 185 | 16.9 | G                                | Deletion                          | p.(Asp52del)       |
| 186 | 45.7 | c.634+1G>T                       | Interference with splice junction |                    |
| 187 | 14   | c.209+1G>A                       | Interference with splice junction |                    |
| 188 | 48.2 | c.1026+1G>A                      | Interference with splice junction |                    |
| 189 | 4.1  | c.388C>T                         | Truncated protein                 | p.(Arg130*)        |
| 190 | 53   | c.527A>G                         | Amino acid change                 | p.(Tyr176Cys)      |
| 191 | 11.9 | c.99delT<br>c.69_74delAGA        | Deletion                          | p.(Ile33Metfs*21)  |
| 192 | 59.7 | CTT                              | Deletion                          | p.(Asp24_Leu25del) |
| 193 | 31.2 | c.634+2T>C                       | Interference with splice junction |                    |
| 194 | 3.2  | c.262T>C                         | Amino acid change                 | p.(Tyr88His)       |
| 195 | 47   | c.741_742insA<br>c.548_551delA   | Insertion                         | p.(Pro248Thrfs*5)  |
| 196 | 55.4 | GAA                              | Deletion                          | p.(Lys183Ilefs*15) |
| 197 | 38.4 | c.209+1G>A                       | Interference with splice junction |                    |
| 198 | 18.3 | c.640C>T                         | Truncated protein                 | p.(Gln214*)        |
| 199 | 9.2  | c.895G>T                         | Truncated protein                 | p.(Glu299*)        |
| 200 | 46.5 | c.463T>C                         | Amino acid change                 | p.(Tyr155His)      |
| 201 | 12   | c.508A>C                         | Amino acid change                 | p.(Ser170Arg)      |
| 202 | 43   | c.593_602del10<br>c.414_416delTT | Deletion                          | p.(Met198Lysfs*20) |
| 203 | 56.7 | T                                | Deletion                          | p.(Tyr138*)        |
| 204 | 47.4 | c.959delT                        | Deletion                          | p.(Leu320*)        |
| 205 | 6.2  | c.406T>C                         | Amino acid change                 | p.(Cys136Arg)      |
| 206 | 75.6 | c.-853C>G                        | Promoter                          |                    |
| 207 | 63.1 | c.1003C>T                        | Truncated protein                 | p.(Arg335*)        |
| 208 | 5.4  | c.697C>T                         | Truncated protein                 | p.(Arg233*)        |
| 209 | 36.1 | c.395G>T                         | Amino acid change                 | p.(Gly132Val)      |
| 210 | 37.3 | c.395G>T                         | Amino acid change                 | p.(Gly132Val)      |
| 211 | 39   | c.48T>A                          | Truncated protein                 | p.(Tyr16*)         |
| 212 | 48.5 | c.388C>T                         | Truncated protein                 | p.(Arg130*)        |
| 213 | 32   | c.49C>T                          | Truncated protein                 | p.(Gln17*)         |
| 214 | 2.9  | c.334C>G                         | Amino acid change                 | p.(Leu112Val)      |
| 215 | 45.2 | c.1003C>T                        | Truncated protein                 | p.(Arg335*)        |
| 216 | 62.3 | c.633C>A                         | Truncated protein                 | p.(Cys211*)        |
| 217 | 9.6  | c.388C>T                         | Truncated protein                 | p.(Arg130*)        |
| 218 | 38.9 | c.540C>G                         | Truncated protein                 | p.(Tyr180*)        |
| 219 | 49.6 | c.-1177C>T                       | Promoter                          |                    |
| 220 | 16.8 | c.202T>C                         | Amino acid change                 | p.(Tyr68His)       |
| 221 | 38.1 | c.389G>A                         | Amino acid change                 | p.(Arg130Gln)      |
| 222 | 39.7 | c.18_22del5                      | Deletion                          | p.(Lys6Asnfs*3)    |
| 223 | 30.3 | c.395G>T                         | Amino acid change                 | p.(Gly132Val)      |
| 224 | 4.2  | c.755A>G                         | Amino acid change                 | p.(Asp252Gly)      |
| 225 | 57.3 | c.1003C>T                        | Truncated protein                 | p.(Arg335*)        |
| 226 | 5.9  | c.204C>A                         | Truncated protein                 | p.(Tyr68*)         |



|     |      |                           |                                   |                                                  |
|-----|------|---------------------------|-----------------------------------|--------------------------------------------------|
| 227 | 46.8 | c.389G>A<br>c.706_708delG | Amino acid change                 | p.(Arg130Gln)                                    |
| 228 | 39.4 | ACinsTTGT                 | InDel                             | p.(Asp236Leufs*2)                                |
| 229 | 35.7 | c.445_446insA             | Insertion                         | p.(Glu150Argfs*30)                               |
| 230 | 53.3 | c.165-1G>A                | Interference with splice junction |                                                  |
| 231 | 49.8 | c.49C>T                   | Truncated protein                 | p.(Gln17*)                                       |
| 232 | 38.9 | c.742_743insA             | Insertion                         | p.(Pro248Hisfs*5)                                |
| 233 | 56.4 | c.95T>A                   | Amino acid change                 | p.(Ile32Asn)                                     |
| 234 | 53.6 | c.1003C>T                 | Truncated protein                 | p.(Arg335*)                                      |
| 235 | 15.7 | c.388C>T                  | Truncated protein                 | p.(Arg130*)                                      |
| 236 | 5.1  | c.722T>C<br>c.956_959delC | Amino acid change                 | p.(Phe241Ser)                                    |
| 237 | 40.4 | TTT<br>c.597_599delG      | Deletion                          | p.(Thr319Lysfs*24)<br>p.(Met199_Phe200delinsIle) |
| 238 | 14.9 | TT                        | Deletion                          | )                                                |
| 239 | 3.6  | c.455T>C                  | Amino acid change                 | p.(Leu152Pro)                                    |
| 240 | 61.3 | c.733C>T                  | Truncated protein                 | p.(Gln245*)                                      |
| 241 | 3.4  | c.549_550insA             | Insertion                         | p.(Asn184Lysfs*6)                                |
| 242 | 44.1 | c.407G>A                  | Amino acid change                 | p.(Cys136Tyr)                                    |
| 243 | 3.3  | c.209+1insT               | Interference with splice junction |                                                  |
| 244 | 42.4 | c.445_446insA             | Insertion                         | p.(Glu150Argfs*30)                               |
| 245 | 34.8 | c.633C>A                  | Truncated protein                 | p.(Cys211*)                                      |
| 246 | 28.3 | c.49C>T                   | Truncated protein                 | p.(Gln17*)                                       |
| 247 | 27.6 | c.1026+1G>A               | Interference with splice junction |                                                  |
| 248 | 1.7  | c.1026+1G>A               | Interference with splice junction |                                                  |
| 249 | 32.1 | c.1003C>T                 | Truncated protein                 | p.(Arg335*)                                      |
| 250 | 48.9 | c.655C>T                  | Truncated protein                 | p.(Gln219*)                                      |
| 251 | 50.5 | c.388C>T                  | Truncated protein                 | p.(Arg130*)                                      |
| 252 | 46.7 | c.388C>T                  | Truncated protein                 | p.(Arg130*)                                      |
| 253 | 32.1 | c.405_406insA             | Insertion                         | p.(Cys136Metfs*44)                               |
| 254 | 3    | c.127G>A                  | Amino acid change                 | p.(Glu43Lys)                                     |
| 255 | 52.8 | c.404T>A                  | Amino acid change                 | p.(Ile135Lys)                                    |
| 256 | 57.3 | c.872_873insA             | Insertion                         | p.(Asn292Lysfs*6)                                |
| 257 | 36.8 | c.71A>G                   | Amino acid change                 | p.(Asp24Gly)                                     |
| 258 | 6.7  | c.71A>G                   | Amino acid change                 | p.(Asp24Gly)                                     |
| 259 | 23.4 | c.655C>T                  | Truncated protein                 | p.(Gln219*)                                      |
| 260 | 46.9 | c.697C>T                  | Truncated protein                 | p.(Arg233*)                                      |
| 261 | 49.7 | c.165-2A>G                | Interference with splice junction |                                                  |
| 262 | 31.1 | c.195C>G                  | Truncated protein                 | p.(Tyr65*)                                       |
| 263 | 2.3  | c.372T>G                  | Amino acid change                 | p.(Cys124Trp)                                    |
| 264 | 29.7 | c.48T>A                   | Truncated protein                 | p.(Tyr16*)                                       |
| 265 | 19   | c.76A>C                   | Amino acid change                 | p.(Thr26Pro)                                     |
| 266 | 49.5 | c.388C>T                  | Truncated protein                 | p.(Arg130*)                                      |
| 267 | 42.9 | c.846_855del10            | Deletion                          | p.(Glu284Glnfs*4)                                |
| 268 | 45.2 | c.407G>A                  | Amino acid change                 | p.(Cys136Tyr)                                    |
| 269 | 54.5 | c.545T>C                  | Truncated protein                 | p.(Leu182Ser)                                    |
| 270 | 49.8 | c.1003C>T                 | Truncated protein                 | p.(Arg335*)                                      |
| 271 | 49.9 | c.388C>T                  | Truncated protein                 | p.(Arg130*)                                      |
| 272 | 22.9 | c.801+1G>T                | Interference with splice junction |                                                  |
| 273 | 37.4 | c.1003C>T                 | Truncated protein                 | p.(Arg335*)                                      |

|     |      |               |                                   |                       |
|-----|------|---------------|-----------------------------------|-----------------------|
| 274 | 45.4 | c.389G>T      | Amino acid change                 | p.(Arg130Leu)         |
| 275 | 53.5 | c.697C>T      | Truncated protein                 | p.(Arg233*)           |
| 276 | 32.7 | c.335T>C      | Amino acid change                 | p.(Leu112Pro)         |
| 277 | 45.1 | c.72_73insAGA | Insertion                         | p.(Asp24_Leu25insArg) |
| 278 | 4.1  | c.697C>T      | Truncated protein                 | p.(Arg233*)           |
| 279 | 28.8 | c.389G>T      | Amino acid change                 | p.(Arg130Leu)         |
| 280 | 4.2  | c.332G>A      | Truncated protein                 | p.(Trp111*)           |
|     |      | c.741_742insC |                                   |                       |
| 281 | 43.6 | G             | Insertion                         | p.(Pro248Argfs*9)     |
| 282 | 73.1 | c.1026+1G>A   | Interference with splice junction |                       |
| 283 | 33.1 | c.502delA     | Deletion                          | p.(Ile168Phefs*15)    |
| 284 | 51.3 | c.96delT      | Deletion                          | p.(Ile33Leufs*21)     |
| 285 | 8.9  | c.1003C>T     | Truncated protein                 | p.(Arg335*)           |
| 286 | 25.8 | c.287C>G      | Amino acid change                 | p.(Pro96Arg)          |
| 287 | 5.2  | c.640C>T      | Truncated protein                 | p.(Gln214*)           |
| 288 | 20.1 | c.211delT     | Deletion                          | p.(Cys71Valfs*28)     |
| 289 | 39.6 | c.686C>G      | Truncated protein                 | p.(Ser229*)           |
| 290 | 26.7 | c.371G>C      | Amino acid change                 | p.(Cys124Ser)         |
